# Supplementary material
Source: ML conference proceedings conference paper supplement (https://openaccess.thecvf.com/content/ICCV2025/html/Yeo_Zero-AVSR_Zero-Shot_Audio-Visual_ICCV_2025_paper.html)
Supplement: Supplementary file 1 [file Yeo_Zero-AVSR_Zero-Shot_Audio-Visual_ICCV_2025_supplemental.pdf]

# Zero-AVSR: Zero-Shot Audio-Visual Speech Recognition with LLMs by Learning Language-Agnostic Speech Representations

## Supplementary Material

### 7. Detailed Information of MARC

The MARC dataset is driven by combining the existing audio-visual speech datasets. Specifically, the labeled audio-visual speech datasets, LRS3 [33] and MuAViC [26], and the unlabeled audio-visual speech datasets, VoxCeleb2 [58] and AVSpeech [59], are combined. The information of each dataset is as follows:

**Lip Reading Sentences 3 (LRS3)** [33] is a dataset designed for AVSR and is one of the most widely used resources. It contains 433 hours of audio-visual English data with human-annotated transcriptions, sourced from TED and TEDx talks.

**Multilingual Audio-Visual Corpus (MuAViC)** [26] is a dataset for multilingual audio-visual speech recognition and translation, collected from TED and TEDx talks across nine languages and comprising 1,200 hours of data with human-annotated transcriptions. Since its English portion overlaps with LRS3 and the preprocessing differs due to a different landmark detector, we exclusively use the English portion of LRS3 following the process in [9].

**VoxCeleb2** [58] is a dataset for speaker recognition containing 2,442 hours of multilingual audio-visual data. Although it includes speaker ID information, it lacks human-annotated text transcriptions and language labels.

**AVSpeech** [59] is a dataset aimed at isolating a target speaker’s voice from mixed audio, sourced from YouTube videos and comprising 4,700 hours of multilingual audio-visual data. Like VoxCeleb2, it does not provide human-annotated text transcriptions or language labels.

The unlabeled audio-visual datasets, VoxCeleb2 and AVSpeech, are labeled using language identification and ASR. For language identification, we use the MMS-LID-1024 model<sup>2</sup> with a threshold of 0.95 for the confidence score. To generate language-specific graphemes, we utilize the pre-trained MMS-1B-ALL<sup>3</sup> ASR model in conjunction with a language adapter, which is selected based on the identified language. Furthermore, during the decoding stage, we leverage language-specific language models<sup>4</sup>. The resulting MARC dataset consists of 82 languages and approximately 2,916 hours of audio-visual data. The languages and their respective families [65] in the MARC dataset are listed in Tables 8 and 9.

<sup>2</sup><https://huggingface.co/facebook/mms-lid-1024>

<sup>3</sup><https://huggingface.co/facebook/mms-1b-all>

<sup>4</sup><https://huggingface.co/facebook/mms-ccims>

| Method                           | Unseen Lang. | Target Language (CER(%),↓) |      |      |      |      |      |      |      | Avg (w/o Eng) |
|----------------------------------|--------------|----------------------------|------|------|------|------|------|------|------|---------------|
|                                  |              | Ara                        | Deu  | Ell  | Spa  | Fra  | Ita  | Por  | Rus  |               |
| Cascaded Zero-AVSR (Llama3.2-3B) | Ara          | 86.6                       | 25.2 | 56.3 | 13.5 | 33.4 | 15.5 | 18.5 | 55.3 | 37.9          |
|                                  | Deu          | 76.8                       | 67.0 | 55.0 | 12.4 | 21.5 | 13.6 | 14.8 | 53.1 | 44.3          |
|                                  | Ell          | 68.5                       | 25.5 | 75.2 | 13.9 | 29.2 | 15.3 | 14.8 | 58.8 | 39.3          |
|                                  | Spa          | 73.6                       | 25.0 | 53.8 | 34.8 | 20.3 | 18.8 | 16.1 | 53.9 | 37.1          |
|                                  | Fra          | 76.8                       | 24.7 | 56.7 | 15.5 | 82.2 | 14.7 | 17.6 | 54.3 | 40.0          |
|                                  | Ita          | 73.7                       | 25.2 | 54.2 | 12.7 | 26.4 | 36.7 | 14.8 | 55.9 | 37.6          |
|                                  | Por          | 74.5                       | 25.7 | 54.1 | 17.1 | 21.4 | 14.4 | 63.0 | 55.2 | 41.4          |
|                                  | Rus          | 68.6                       | 24.6 | 55.8 | 14.1 | 22.2 | 16.8 | 14.6 | 79.8 | 38.1          |
| Zero-AVSR (Llama3.2-3B)          | Ara          | 76.5                       | 16.2 | 21.6 | 6.8  | 7.4  | 7.0  | 7.7  | 18.5 | 19.7          |
|                                  | Deu          | 56.9                       | 52.9 | 22.4 | 7.4  | 8.2  | 6.9  | 7.7  | 18.7 | 26.4          |
|                                  | Ell          | 53.9                       | 16.1 | 62.1 | 6.8  | 8.1  | 6.8  | 7.8  | 18.4 | 24.3          |
|                                  | Spa          | 57.8                       | 16.7 | 24.4 | 19.7 | 8.5  | 7.5  | 8.6  | 20.2 | 19.0          |
|                                  | Fra          | 55.3                       | 16.0 | 21.2 | 6.9  | 54.6 | 7.2  | 7.9  | 18.1 | 20.7          |
|                                  | Ita          | 61.6                       | 17.2 | 22.6 | 7.1  | 8.1  | 25.1 | 7.7  | 18.6 | 20.7          |
|                                  | Por          | 58.0                       | 16.3 | 24.7 | 7.5  | 7.7  | 7.4  | 44.0 | 18.8 | 22.3          |
|                                  | Rus          | 57.7                       | 16.0 | 22.7 | 7.1  | 7.7  | 6.9  | 7.6  | 45.4 | 21.5          |

Table 7. The zero-shot language AVSR performances of Cascaded Zero-AVSR and Zero-AVSR using the same LLM (Llama3.2-3B) on MuAViC dataset. We train 8 AV-Romanizers, setting each language as an unseen language, and evaluate their zero-shot performance, which are shown in blue-colored cells.

### 8. The Effectiveness of Zero-AVSR

In order to confirm the effectiveness of the Zero-AVSR compared to the Cascaded Zero-AVSR, we also report the zero-shot language AVSR performance of Cascaded Zero-AVSR using Llama3.2-3B, in Table 7. Therefore, since Cascaded Zero-AVSR and Zero-AVSR utilize the same LLM here, we can evaluate the effectiveness of finetuning the LLM by employing the proposed multi-task framework. By comparing the zero-shot speech recognition performances (*i.e.*, shown in blue-colored cells), we can confirm that Zero-AVSR improves performance over all 8 languages, demonstrating the effectiveness of incorporating speech features directly into the LLM instead of employing a text formula. Furthermore, when comparing the average CER, taking into account both seen and unseen languages, Zero-AVSR outperforms the Cascaded Zero-AVSR model. These results show the promise of Zero-AVSR that if a better LLM is employed and finetuned, performance can be improved even more.

### 9. Noise-robustness Experiments

By employing audio-visual speech inputs, we can achieve more robust noise performance in speech recognition compared to when we employ audio-only speech inputs. In

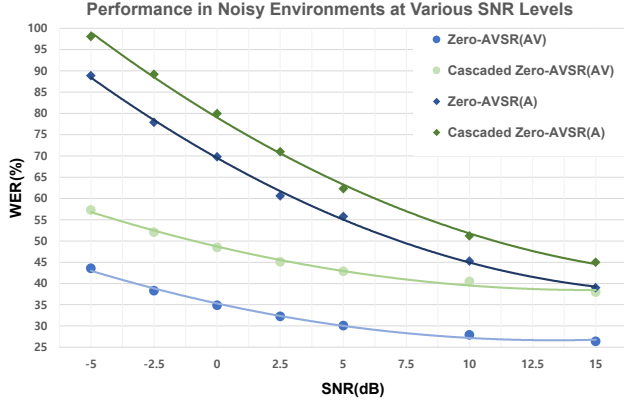

Figure 3. The performances of Cascaded Zero-AVSR and Zero-AVSR using audio-only (A) and audio-visual (AV) inputs under different SNR noise levels.

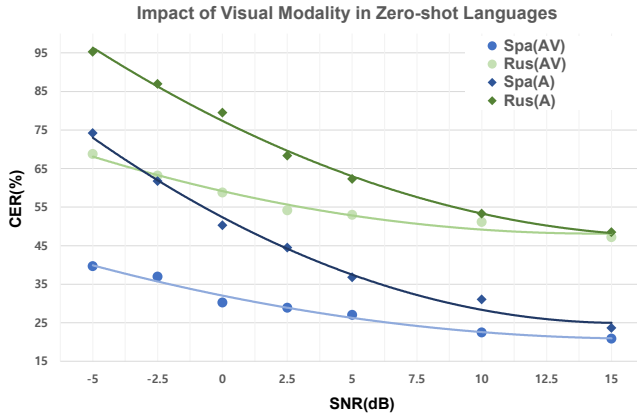

Figure 4. Performance of Zero-AVSR on zero-shot languages, Spanish (Spa) and Russian (Rus), using audio-only (A) and audio-visual (AV) inputs across various SNR levels.

this section, we analyze the performance of both Cascaded Zero-AVSR and Zero-AVSR by differing the acoustic noise levels from -5 dB SNR to 15 dB SNR. The acoustic noise is uniformly sampled among natural, babble, music, speech partitions from MUSAN [64]. The analysis results are shown in Fig. 3. It shows the average WER for all 9 languages. In both Cascaded Zero-AVSR and Zero-AVSR, the audio-only (A) models’ performances are significantly degraded according to the noise become strong. However, we can confirm that the audio-visual (AV) models show robust performances over the different noise levels.

We have seen that by using audio-visual speech inputs, we can achieve more robust speech recognition performances. Here, we also analyze this in zero-shot language settings. To this end, we measure CERs of Zero-AVSR model under various SNR levels on two unseen languages, Spanish and Russian. The results in Fig. 4 show that, similar to the seen language scenarios, the audio-visual (AV) model outperforms the audio-only (A) framework across all SNR levels. Especially, in the zero-shot language setting,

|                    |                                     |
|--------------------|-------------------------------------|
| Ground Truth :     | このくつしたは じょうぶでやすいです                  |
| Prediction :       | このくたしゃたばこぶでやすいです                    |
| Roman Prediction : | konu kutcashitava cobudeasuides     |
| Filename :         | Common_voice_ja_20184324.wav        |
| Ground Truth :     | といれからでるとき てをあらいます                   |
| Prediction :       | といれがてるついておあらいます                     |
| Roman Prediction : | to irega terutui teo alaimas        |
| Filename :         | Common_voice_ja_20853323.wav        |
| Ground Truth :     | だれかわたしのぼるぺんをもっていませんか                |
| Prediction :       | だれかばだしのぼろぺんおもちあせんか                  |
| Roman Prediction : | dareka badasinoporopen omoti asenka |
| Filename :         | Common_voice_ja_22727312.wav        |
| Ground Truth :     | あそこにきむらさんがたっています                    |
| Prediction :       | あそこにきたらさんがたたます                      |
| Roman Prediction : | asokoni kimera sanggatata mas       |
| Filename :         | Common_voice_ja_24592150.wav        |

Figure 5. Examples of prediction results from the Cascaded Zero-AVSR on an unseen language, Japanese, on out-of-domain data.

we can observe that while both models exhibit comparable performance under clean environment (*i.e.*, higher SNR), the performance gain by using audio-visual inputs over the audio-only inputs increases as the SNR decreases.

## 10. Zero-Shot Performance on Out-of-Domain

We evaluate the extent to which the proposed Zero-AVSR framework can perform on out-of-domain data. To this end, we evaluate the zero-shot speech recognition performance on Japanese, whose language family is not presented in the training set of MARC. We measure the Japanese performance on the test set of CommonVoice [66] by using audio-only inputs. The Cascaded Zero-AVSR achieves 60.9% CER and the Zero-AVSR achieves 64.9% CER. These results demonstrate that the proposed Zero-AVSR framework can be employed for languages even when no data from the same language family is used, showing its scalability to more languages. The examples of prediction using the Cascaded Zero-AVSR are shown in Fig. 5. For example, as shown in the last row, the AV-Romanizer predicts the Roman text as ‘asokoni kimera sanggatata mas’, and the LLM de-romanizes this text into Japanese as ‘あそこにきたらさんか\*たたます’. Notably, despite not being perfect, the prediction was made without Japanese data being employed during the training of the proposed AV-Romanizer.

## 11. Qualitative Error Analysis

While our proposed Zero-AVSR framework enables speech recognition in zero-shot languages, its performance still lags behind that on seen languages. In this section, we conduct a qualitative error analysis to better understand the types and root causes of failures. Specifically, we investigate two error categories: mis-romanization and

|                                          |                                                        |
|------------------------------------------|--------------------------------------------------------|
| Failure case : Mis-romanization.         |                                                        |
| Ground Truth :                           | я не знаю почему так происходит                        |
| Roman Ground Truth :                     | ya ne znayu pochemu tak proiskhodit                    |
| Roman Prediction :                       | ila kzau pochemu tak prosvod                           |
| Grapheme Prediction :                    | Ила кзѡу почему так просвод                            |
| Language :                               | Russian                                                |
| Ground Truth :                           | não havia esta confusão                                |
| Prediction :                             | nao havia esta confusao                                |
| Roman Prediction :                       | via essa confusa                                       |
| Grapheme Prediction :                    | via essa confusão                                      |
| Language :                               | Portuguese                                             |
| Failure case : LLM de-romanization error |                                                        |
| Ground Truth :                           | اختيار منك حتى تجاوب على بعض الأسئلة،                  |
| Roman Ground Truth :                     | taban, ana musta'id. eltahab as'ilatak.                |
| Grapheme Prediction :                    | تابع، أنا مستعد. التحق بأسئلتك                         |
| Language :                               | Arabic                                                 |
| Ground Truth :                           | أن أبطال هذه القصص سيكونون أحد الحاضرين في هذا المؤتمر |
| Roman Ground Truth :                     | n abtal hadhih al-qisas sayakunun ahad al-hadirin      |
| Grapheme Prediction :                    | fi hadha al-mu'tamar أنت بخير ؟                        |
| Language :                               | Arabic                                                 |

Figure 6. Qualitative examples of mis-romanization and LLM-deromanization errors.

LLM-deromanization. Mis-romanization errors occur when the AV-romanizer’s output differs from the ground-truth romanization. LLM-deromanization errors arise when, after feeding the ground-truth romanization into the LLM, the model mispredicts the original graphemes. Examples of both error types are illustrated in Fig. 6. In our analysis, we found that the vast majority of errors stem from mis-romanization stage. This suggests that there is still room for improving the overall zero-shot language recognition performance by refining the romanization stage (*i.e.*, the AV-Romanizer).

## Limitation

Despite demonstrating strong zero-shot performance, our framework exhibits two key limitations: 1) Language coverage depends on LLM support. Our AVSR pipeline relies on an LLM for each target language. When the LLM underperforms on a given language, particularly low-resource ones, pipeline accuracy degrades accordingly. 2) Prosodic information is lost through romanization. We convert all inputs to unaccented Roman characters, which inherently discards tone, stress, and vowel-length distinctions. This omission is especially critical in tonal languages, where pitch shifts can change word meaning entirely. To address these issues, future zero-shot AVSR systems may consider 1) incorporating prosodic features, tone, stress, and rhythm into language-agnostic encodings, and 2) leveraging next-generation LLMs trained on low-resource languages. These enhancements will broaden robust support across diverse linguistic contexts.

| Language Family | Subgroup     | Branch    | Number | Language Name | Language Code | Video Hours |
|-----------------|--------------|-----------|--------|---------------|---------------|-------------|
| Indo-European   | Germanic     | Western   | 1      | English       | eng           | 435.2       |
|                 |              |           | 2      | German        | deu           | 327.5       |
|                 |              |           | 3      | Dutch         | nld           | 72.5        |
|                 |              |           | 4      | Afrikaans     | afr           | 1.7         |
|                 |              |           | 5      | Luxembourgish | ltz           | 1.9         |
|                 |              | Northern  | 6      | Swedish       | swe           | 19.3        |
|                 |              |           | 7      | Danish        | dan           | 18.1        |
|                 |              |           | 8      | Norwegian     | nob           | 2.8         |
|                 |              |           | 9      | Icelandic     | isl           | 0.4         |
|                 | Romance      | -         | 10     | Italian       | ita           | 146.8       |
|                 |              |           | 11     | French        | fra           | 291.7       |
|                 |              |           | 12     | Spanish       | spa           | 216.2       |
|                 |              |           | 13     | Portuguese    | por           | 408.0       |
|                 |              |           | 14     | Romanian      | ron           | 16.0        |
|                 |              |           | 15     | Catalan       | cat           | 7.0         |
|                 |              |           | 16     | Galician      | glg           | 8.7         |
|                 |              |           | 17     | Asturian      | ast           | 0.1         |
|                 |              |           | 18     | Occitan       | oci           | 1.5         |
|                 | Celtic       | Brythonic | 19     | Welsh         | cym           | 97.1        |
|                 |              | Goidelic  | 20     | Irish         | gle           | 0.1         |
|                 | Hellenic     | -         | 21     | Greek         | ell           | 21.5        |
|                 | Slavic       | Eastern   | 22     | Russian       | rus           | 123.8       |
|                 |              |           | 23     | Ukrainian     | ukr           | 3.8         |
|                 |              |           | 24     | Belarusian    | bel           | 5.9         |
|                 |              | Western   | 25     | Polish        | pol           | 50.5        |
|                 |              |           | 26     | Czech         | ces           | 20.6        |
|                 |              |           | 27     | Slovak        | slk           | 4.9         |
|                 |              | Southern  | 28     | Bulgarian     | bul           | 3.9         |
|                 |              |           | 29     | Slovene       | slv           | 4.6         |
|                 |              |           | 30     | Macedonian    | mkd           | 0.3         |
|                 |              |           | 31     | Bosnian       | bos           | 0.8         |
|                 |              |           | 32     | Croatian      | hrv           | 2.6         |
|                 |              |           | 33     | Serbian       | srp           | 0.9         |
|                 | Indo-Iranian | Iranian   | 34     | Persian       | fas           | 7.6         |
|                 |              |           | 35     | Kurdish       | ckb           | 0.05        |
|                 |              |           | 36     | Tajik         | tgk           | 0.1         |
|                 |              |           | 37     | Pushto        | pus           | 0.3         |
|                 |              | Indic     | 38     | Hindi         | hin           | 99.0        |
|                 |              |           | 39     | Urdu          | urd           | 8.6         |
|                 |              |           | 40     | Bengali       | ben           | 8.8         |
|                 |              |           | 41     | Punjabi       | pan           | 3.0         |
|                 |              |           | 42     | Marathi       | mar           | 8.2         |
|                 |              |           | 43     | Gujarati      | guj           | 1.6         |
|                 |              |           | 44     | Assamese      | asm           | 0.2         |
|                 |              |           | 45     | Nepali        | npi           | 4.5         |
|                 |              |           | 46     | Sindhi        | snd           | 0.5         |
|                 |              |           | 47     | Odia          | ory           | 0.1         |

Table 8. The Data Statistics of the MARC dataset 1.

| Language Family | Subgroup    | Branch       | Number | Language Name | Language Code | Video Hours |
|-----------------|-------------|--------------|--------|---------------|---------------|-------------|
| Indo-European   | Baltic      | -            | 48     | Lithuanian    | lit           | 2.9         |
|                 |             | -            | 49     | Latvian       | lav           | 1.3         |
|                 | -           | -            | 50     | Armenian      | hye           | 0.7         |
| Uralic          | Finno-Ugric | Finnic       | 51     | Finnish       | fin           | 9.7         |
|                 |             |              | 52     | Estonian      | est           | 2.1         |
|                 |             | Ugric        | 53     | Hungarian     | hun           | 11.0        |
| Altaic          | Turkic      | Southwestern | 54     | Turkish       | tur           | 50.6        |
|                 |             |              | 55     | Azerbaijani   | aze           | 1.9         |
|                 |             | Northwestern | 56     | Kazakh        | kaz           | 3.8         |
|                 |             |              | 57     | Kyrgyz        | kir           | 0.1         |
|                 |             | Southeastern | 58     | Uzbek         | uzb           | 0.3         |
|                 | Mongolian   | -            | 59     | Mongolian     | mon           | 1.1         |
| Caucasian       | Southern    | -            | 60     | Georgian      | kat           | 1.5         |
| Dravidian       | -           | -            | 61     | Telugu        | tel           | 18.8        |
|                 | -           | -            | 62     | Tamil         | tam           | 18.3        |
|                 | -           | -            | 63     | Kannada       | kan           | 3.6         |
|                 | -           | -            | 64     | Malayalam     | mal           | 15.5        |
| Independent     | -           | -            | 65     | Korean        | kor           | 128.6       |
| Mon-Khmer       | -           | -            | 66     | Vietnamese    | vie           | 32.9        |
| Austronesian    | Western     | -            | 67     | Indonesian    | ind           | 15.0        |
|                 |             | -            | 68     | Javanese      | jav           | 0.1         |
|                 |             | -            | 69     | Tagalog       | tgl           | 6.1         |
| Niger-Congo     | Polynesian  | -            | 70     | Maori         | mri           | 4.9         |
|                 | Atlantic    | -            | 71     | Wolof         | wol           | 1.1         |
|                 |             | -            | 72     | Swahili       | swh           | 1.2         |
|                 | Benue-Congo | -            | 73     | Lingala       | lin           | 0.9         |
|                 |             | -            | 74     | Ganda         | lug           | 0.04        |
|                 |             | -            | 75     | Shona         | sna           | 3.8         |
| Afro-Asiatic    | Semitic     | North Arabic | 76     | Arabic        | ara           | 96.7        |
|                 |             |              | 77     | Maltese       | mlt           | 1.5         |
|                 |             | Canaanitic   | 78     | Hebrew        | heb           | 14.3        |
|                 |             | Ethiopic     | 79     | Amharic       | amh           | 1.2         |
|                 | Cushitic    | -            | 80     | Somali        | som           | 4.6         |
|                 |             | -            | 81     | Oromo         | orm           | 0.1         |
|                 | Chadic      | -            | 82     | Hausa         | hau           | 0.7         |

Table 9. The Data Statistics of the MARC dataset 2.
